# Supplementary material
Source: publisher site journal article supplement (https://www.dovepress.com/article/388868)
Supplement: Supplementary file 1 [file get_supplementary_file.php]

**SUPPLEMENTAL MATERIALS**

**Supplementary Table S1:** Rad-score formula

**Supplementary Table S2**: Difference analysis between training cohort and validation cohort.

**Supplementary Table S3:** DeLong's test for the AUC of each model in the training and validation cohorts.

**Supplementary Table S1** Rad-score formula

***Rad-score*** *= -0.258196988169824*

*- 0.108343432971856 × wavelet-HLH_firstorder_MeanAbsoluteDeviation*

*- 0.282202910346324 × wavelet-HLH_firstorder_Mean*

*+ 0.103846452316561 × wavelet-HHL_firstorder_InterquartileRange*

*- 0.117268723779979 × wavelet-HHL_firstorder_MeanAbsoluteDeviation*

*+ 0.332982229674583 × wavelet-HHH_glcm_JointEntropy*

*- 0.271027914027463 × wavelet-LLL_glrlm_ShortRunEmphasis*

*+ 0.0605628333398211 × log-sigma-1-0-mm-3D_glcm_Idmn*

*- 0.315931539722654 × log-sigma-2-0-mm-3D_firstorder_RootMeanSquared*

*+ 0.120834928948794 × log-sigma-2-0-mm-3D_glcm_Idmn*

*- 0.027402590836356 × log-sigma-2-0-mm-3D_ngtdm_Complexity*

*+ 0.0973927829066483 × log-sigma-5-0-mm-3D_glszm_LargeAreaEmphasis*

*- 0.0391818646841504 × exponential_glszm_GrayLevelNonUniformity*

**Table S2** Difference analysis between training cohort and validation cohort.

| Variable | Training cohort  (n=180) | Validation cohort (n=74) | *P*-value |
| --- | --- | --- | --- |
| Age | 51.14 ± 16.09 | 55.26 ± 16.96 | 0.070 |
| Gender |  |  | 0.212 |
| Male | 104 67.97% | 49 32.03% |  |
| Female | 76 75.25% | 25 24.75% |  |
| ESR | 43.1 ± 26.07 | 47.31 ± 27.03 | 0.248 |
| CRP | 31.46 ± 38.88 | 29.62 ± 31.72 | 0.718 |
| WBC | 7.16 ± 2.47 | 6.87 ± 1.96 | 0.359 |
| RBC | 4.48 ± 0.79 | 4.37 ± 0.73 | 0.315 |
| HGB | 118.3 ± 18.49 | 117.32 ± 18.61 | 0.701 |
| PLT | 321.08 ± 104.79 | 311.09 ± 108.56 | 0.495 |
| NEU | 2.87 ± 2.57 | 3.08 ± 2.42 | 0.546 |
| LYM | 0.89 ± 0.84 | 1.08 ± 1 | 0.124 |
| MONO | 0.34 ± 0.34 | 0.43 ± 0.41 | 0.065 |
| EOS | 0.74 ± 0.74 | 0.73 ± 0.69 | 0.892 |
| BASO | 0.09 ± 0.11 | 0.1 ± 0.13 | 0.575 |
| MCV | 82.29 ± 9.41 | 83.26 ± 8.73 | 0.447 |
| MCH | 26.74 ± 3.64 | 27.11 ± 3.52 | 0.446 |
| MCHC | 324.06 ± 12.36 | 324.91 ± 12.16 | 0.618 |
| RDWCV | 0.24 ± 0.11 | 0.23 ± 0.12 | 0.69 |
| MPV | 4.68 ± 4.09 | 5.14 ± 4.08 | 0.415 |
| PCT | 0.21 ± 0.07 | 0.22 ± 0.09 | 0.232 |
| PDW | 0.2 ± 0.08 | 0.18 ± 0.06 | 0.054 |
| HCT | 3.55 ± 3.72 | 3.26 ± 3.81 | 0.581 |
| MLR | 0.31 ± 0.31 | 0.32 ± 0.27 | 0.856 |
| PMR | 61661.07± 326862.85 | 24308.62 ± 49395.99 | 0.329 |
| PLR | 2433.34 ± 5914.86 | 1396.56 ± 1721.82 | 0.14 |
| NLR | 6.81 ± 11.7 | 4.84 ± 3.08 | 0.155 |
| PNR | 263.05 ± 240.16 | 223.51 ± 206.6 | 0.189 |

CRP, C-reactive protein; ESR, erythrocyte sedimentation rate; WBC, white blood cells; RBC, red blood cells; HGB, hemoglobin; PLT, platelets; NEU, neutrophil count; LYM, lymphocyte count; MONO, monocyte count; EOS, eosinophil count; BASO, Basophil count; MCV, mean red blood cell volume; MCH, mean RBC hemoglobin content; MCHC, mean RBC hemoglobin concentration; RDWCV, RBC volume distribution width CV; MPV, mean platelet volume; PCT, plateletcrit; PDW, platelet volume distribution width; HCT, hematocrit; MLR, monocyte-to-lymphocyte ratio; PMR, platelets-to-monocyte ratio; PLR, platelets-to-lymphocyte ratio; NLR, neutrophil-to-lymphocyte ratio; PNRplatelets-to-neutrophil ratio.

**Table S3** DeLong's test for the AUC of each model in the training and validation cohorts.

| Model 1 | Model 2 | Training cohort  *P*-value | Validation cohort  *P*-value |
| --- | --- | --- | --- |
| clinical | radiomics | 0.804 | 0.680 |
| clinical | clinical+radiomics | <0.001 | 0.148 |
| radiomics | clinical+radiomics | <0.001 | 0.698 |
